# Supplementary material for: DNA Methyltransferases Regulate Pathogenicity of Botrytis cinerea to Horticultural Crops
Source: MDPI journal article supplement (doi:10.3390/jof7080659), 2021-08-14
Supplement: s1 [file jof-1320962-SI.pdf › jof-1320962-SI.pdf]

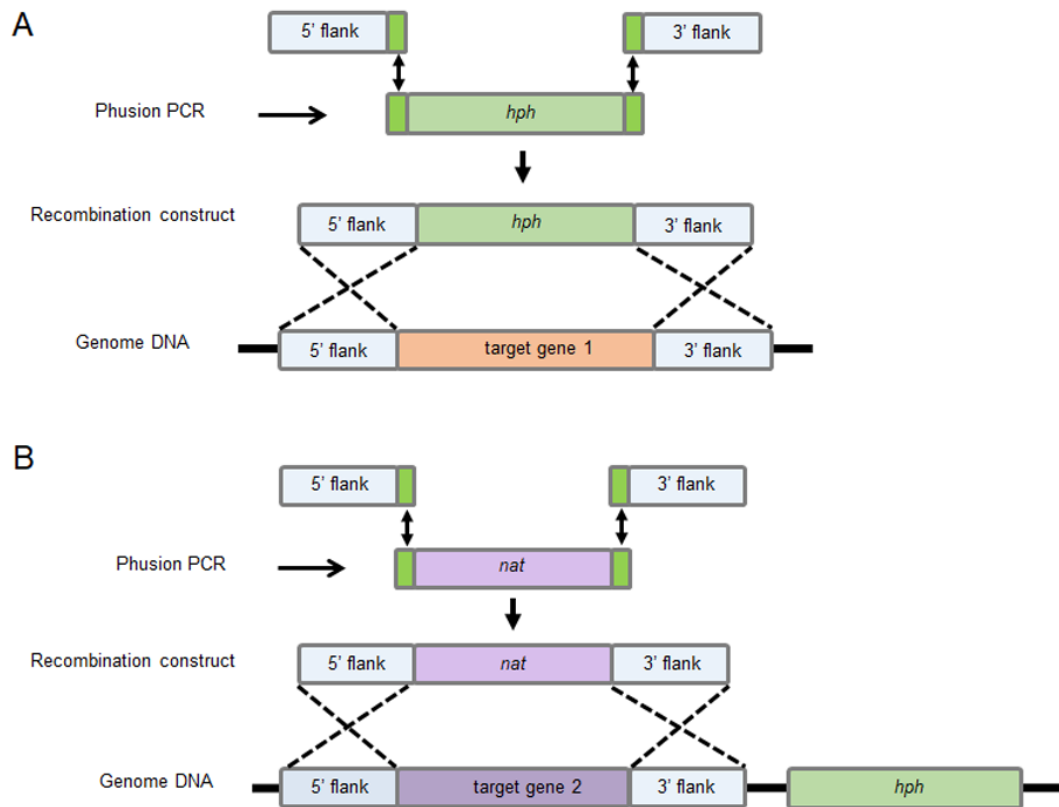

**Figure S1** Knockout strategy of target genes. (A) Strategy for single knockout. *hph*: hygromycin-resistance cassette. (B) Strategy for double knockout. *nat*: nourseothricin-resistance cassette.

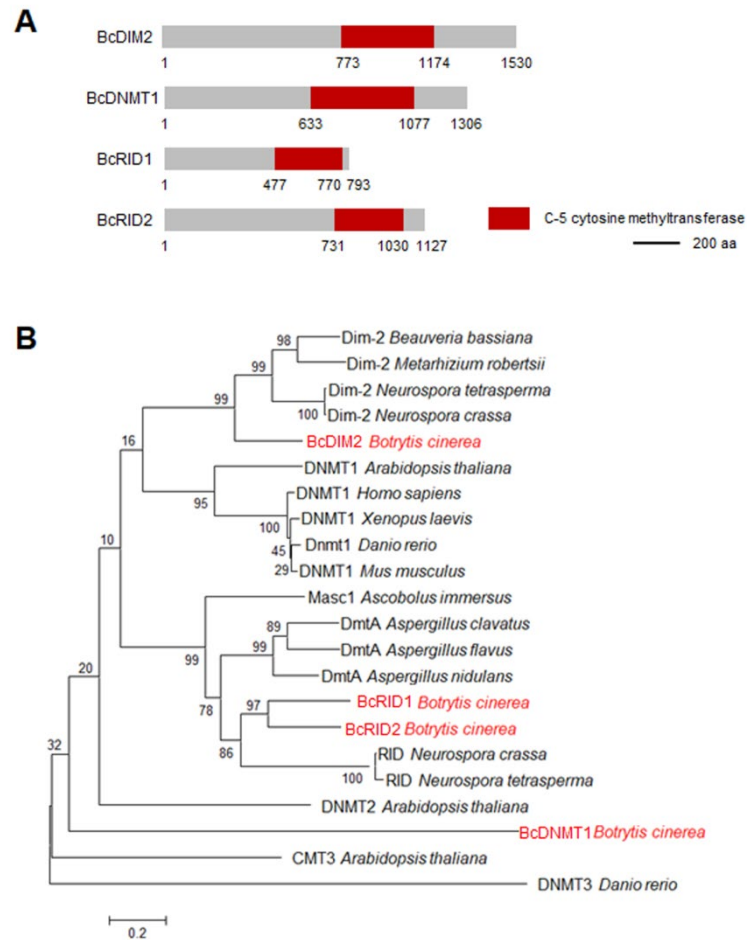

**Figure S2** Analysis of DNA methyltransferases of *B. cinerea*. (A) Schematic diagram of conserved domain of C5 cytosine methyltransferase. (B) Phylogenetic tree of the of 5mC MTase proteins in *B. cinerea*.

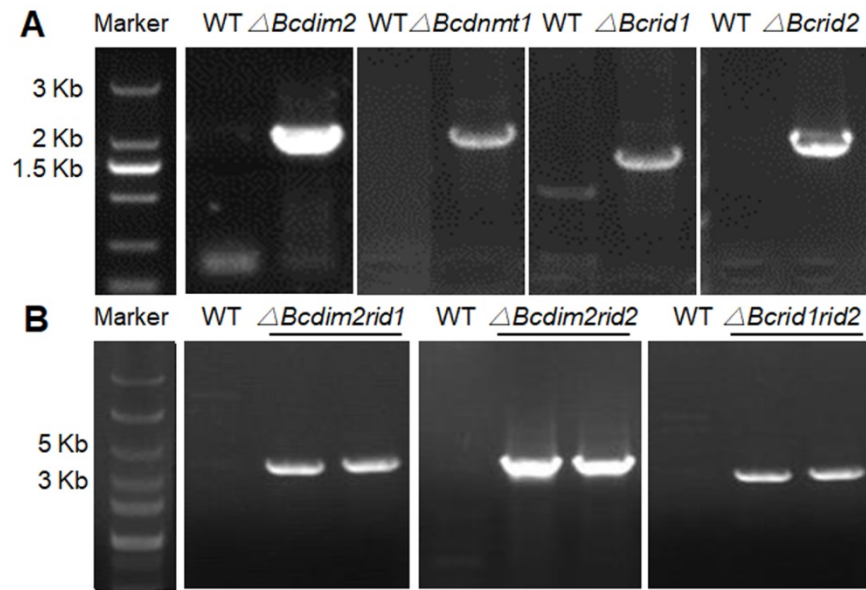

**Figure S3** PCR diagnosis of knockout mutants. Flank-spanning PCR for single knockout mutants (A) and double knockout mutants (B).

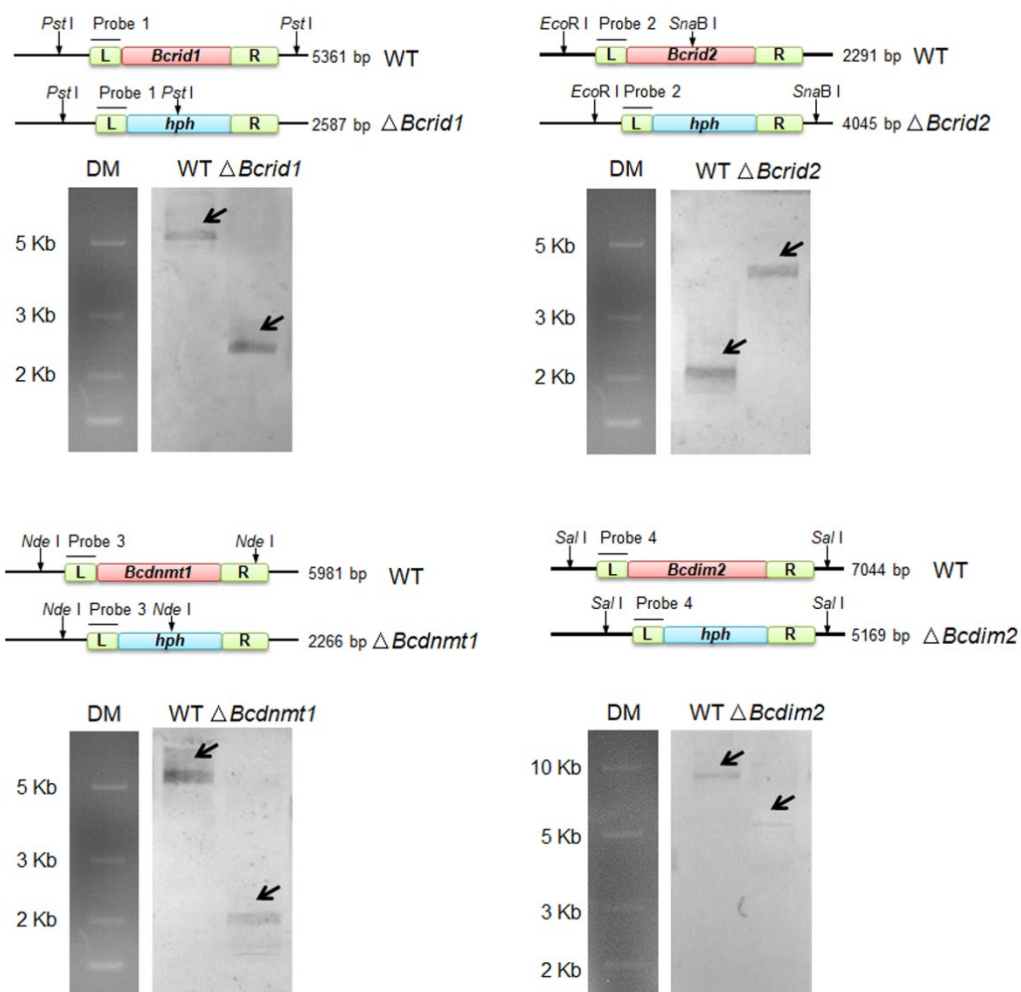

**Figure S4** Southern blot analysis of DNA MTase mutants.

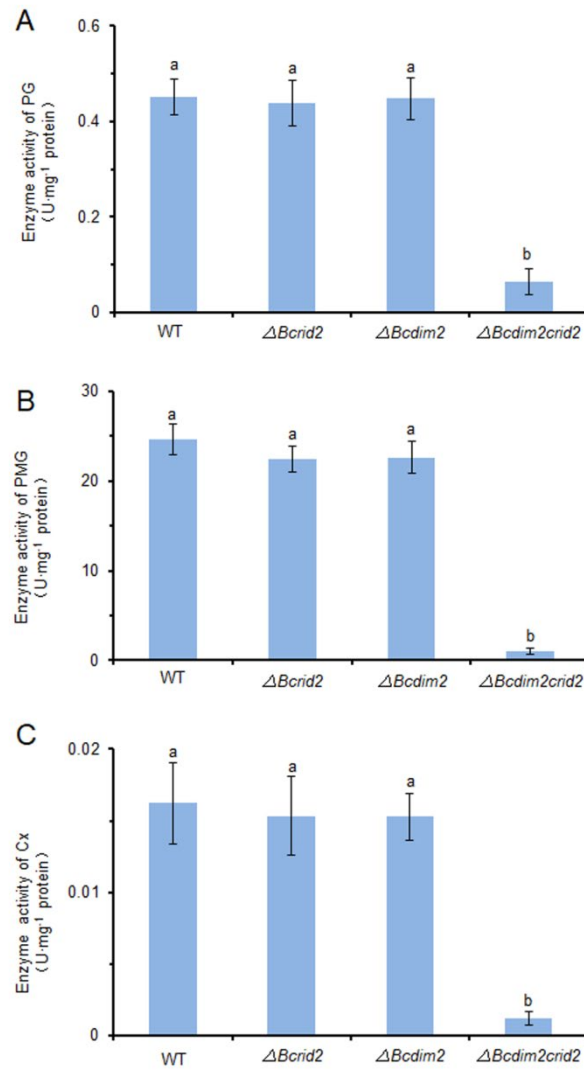

**Figure S5** Activities of extracellular pathogenic proteins are down-regulated in double knockout mutant  $\Delta Bcdim2rid2$ . (A) Activity of polygalacturonase (PG). (B) Activity of poly-methyl galacturonate (PMG). (C) Activity of carboxymethyl cellulose (Cx).

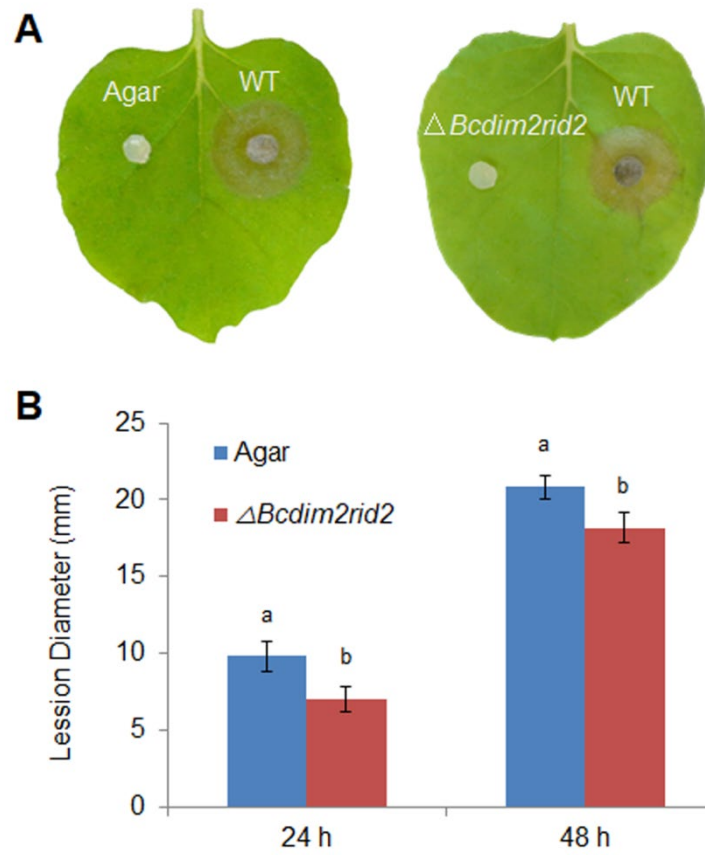

**Figure S6** Pre-infection of  $\Delta Bcdim2rid2$  induced the resistance of host. (A) Disease symptoms on detached tobacco leaves (48 hpi). (B) Lesion diameters on detached tobacco leaves.

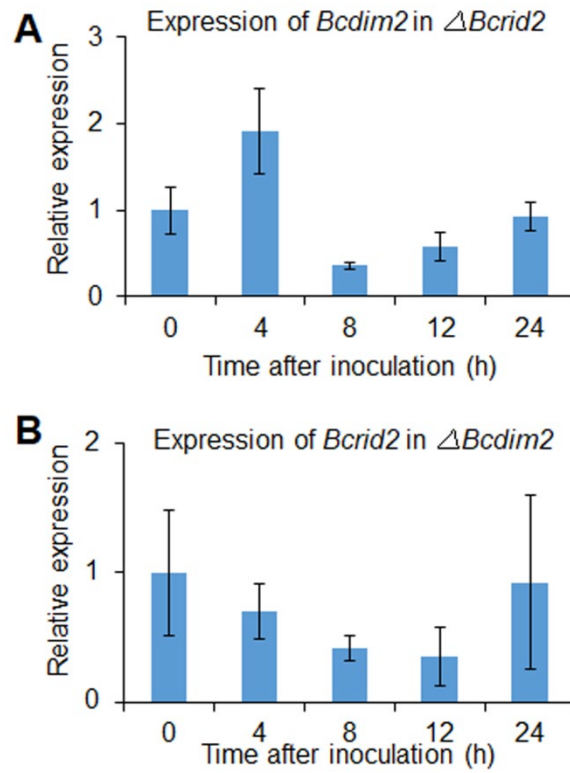

**Figure S7** The expression pattern of *Bcdim2* in  $\Delta Bcrd2$  (A) and the expression pattern of *Bcrd2* in  $\Delta Bcdim2$  during conidial germination.

**Table S1** The primers used for generation of knockout mutants.

| Primers name | Sequence (5'→3')                          |
|--------------|-------------------------------------------|
| Bcdim2-uF    | CTCCACCAACTGCAATCACT                      |
| Bcdim2-uR    | AATCGGAATGCGGCTCCACAATAAAGCCGAGCATACGAAA  |
| Bcdim2-mF    | TTTCGTATGCTCGGCTTTATTGTGGAGCCGCATTCCGATT  |
| Bcdim2-mR    | CTCTTCCCCTTTCTCTCCAAAGGCAACCATGCATGGTTAC  |
| Bcdim2-dF    | GTAACCATGCATGGTTGCCTTTGGAGAGAAAGGGGAAGAG  |
| Bcdim2-dR    | ATTAGTTTGGCGAGTGGATG                      |
| Berdnmt1-uF  | CGATAACAAACCTCGGAATT                      |
| Bcdnmt1-uR   | AATCGGAATGCGGCTCCACAATCTACGCAAACCTTGTCTCA |
| Bcdnmt1-mF   | TGAGACAAGTTTGCGTAGATTGTGGAGCCGCATTCCGATT  |
| Bcdnmt1-mR   | CACATAGACGCTTGTCAATCAGGCAACCATGCATGGTTAC  |
| Bcdnmt1-dF   | GTAACCATGCATGGTTGCCTGATTGACAAGCGTCTATGTG  |
| Bcdnmt1-dR   | GAGCCAAGTGAGAAAGAACG                      |
| Berid1-uF    | CTACCTTCTGCTCGGCTTCT                      |
| Berid1-uR    | AATCGGAATGCGGCTCCACACCCTTACTGCCCTCTCTCTT  |
| Berid1-mF    | AAGAGAGAGGGCAGTAAGGGTGTGGAGCCGCATTCCGATT  |
| Berid1-mR    | TGTTTTCTGTATGCCAGTTTAGGCAACCATGCATGGTTAC  |
| Berid1-dF    | GTAACCATGCATGGTTGCCTAAACTGGCATAAGAAAACA   |
| Berid1-dR    | ATACCACAGAGGCTGAACAA                      |
| Berid2-uF    | CAATCTTCCACTCCCTCATC                      |
| Berid2-uR    | AATCGGAATGCGGCTCCACACAGTAGGTAGCAGGTCAAAC  |
| Berid2-mF    | GTTTGACCTGCTACCTACTGTGTGGAGCCGCATTCCGATT  |
| Berid2-mR    | CCATTCCCCTTCCACTTTTAGGCAACCATGCATGGTTAC   |
| Berid2-dF    | GTAACCATGCATGGTTGCCTAAAAGTGGAAGTGGAATGG   |
| Berid2-dR    | GTGAGTTAGTGGCTCGGATA                      |
| Bcdim2-uR2   | ATGCGGCTCTAGAGGATCCCATAAAGCCGAGCATACGAAA  |
| Bcdim2-mF2   | TTTCGTATGCTCGGCTTTATGGGATCCTCTAGAGCCGCAT  |
| Bcdim2-mR2   | CTCTTCCCCTTTCTCTCCAACGCCGAGTTAGGCAACCATG  |
| Bcdim2-dF2   | CATGGTTGCCTAACTCGGCGTTGGAGAGAAAGGGGAAGAG  |
| Berid1-uR2   | ATGCGGCTCTAGAGGATCCCCCTTACTGCCCTCTCTCTT   |
| Berid1-mF2   | AAGAGAGAGGGCAGTAAGGGGGGATCCTCTAGAGCCGCAT  |
| Berid1-mR2   | TGTTTTCTGTATGCCAGTTTCGCCGAGTTAGGCAACCATG  |
| Berid1-dF2   | CATGGTTGCCTAACTCGGCGAAACTGGCATAAGAAAACA   |
| Berid2-uR2   | ATGCGGCTCTAGAGGATCCCCAGTAGGTAGCAGGTCAAAC  |
| Berid2-mF2   | GTTTGACCTGCTACCTACTGTGTGGAGCCGCATTCCGATT  |
| Berid2-mR2   | CCATTCCCCTTCCACTTTTAGGCAACCATGCATGGTTAC   |
| Berid2-dF2   | GTAACCATGCATGGTTGCCTAAAAGTGGAAGTGGAATGG   |
| Bcdnmt5-uF   | ATTGATAGGTGGACGAGACT                      |
| Bcdnmt5-uR   | AATCGGAATGCGGCTCCACAGAGATGGAATGATTGAGAAA  |
| Bcdnmt5-mF   | TTTCTCAATCATTCCATCTCTGTGGAGCCGCATTCCGATT  |
| Bcdnmt5-mR   | ACAACATGAGCCTAACAGCTAGGCAACCATGCATGGTTAC  |



|                  |                                          |
|------------------|------------------------------------------|
| Bcdnmt5-dF       | GTAACCATGCATGGTTGCCTAGCTGTTAGGCTCATGTTGT |
| Bcdnmt5-dR       | CATATTTGAGTTCGCTGGAT                     |
| Bcdim2-detect-F  | ACTGTATGGCCCCCTCTACC                     |
| Bcdnmt1-detect-F | CAAAGGTTATGAGGAAGGCC                     |
| Bcrd1-detect-F   | TTGACAGCCAATTCCATACC                     |
| Bcrd2-detect-F   | TTCCTCGTTCCTTGGGTGCT                     |
| Bcdnmt5-detect-F | TTTGCCGTTTCGTGTTATTGT                    |
| hph-detect-R     | GTTTGCTGGTTACGCTTT                       |
| nat-detect-R     | ATTCTATCCCTGGCTTTCCC                     |

**Table S2** The primer sequences for RT-qPCR.

| Gene names      | Primer names | Sequences (5'-3' )        |
|-----------------|--------------|---------------------------|
| <i>Bcpgl</i>    | Bcpgl-q-F    | GATGTTGGTTCCTCCAGCGATA    |
|                 | Bcpgl-q-R    | CCGGAGTTGATAGCGAGACAGT    |
| <i>Bcpg2</i>    | Bcpg2-q-F    | CGCCCCAGCAGATCTTGATA      |
|                 | Bcpg2-q-R    | AGCAGGTGGTCTTTGAGGCTAT    |
| <i>Bcxyn11a</i> | Bcxyn11a-q-F | ACATACTCCAACGGAGCCAATG    |
|                 | Bcxyn11a-q-R | CATCCTTTTCCACCGACGAA      |
| <i>BcnoxA</i>   | BcnoxA-q-F   | TCGCGTCTCCGTTGTATGAA      |
|                 | BcnoxA-q-R   | TCCCTGTGGCTTGATTAACCA     |
| <i>BcnoxB</i>   | BcnoxB-q-F   | GGTCCAAAAGTGTTGGGTTAGTCA  |
|                 | BcnoxB-q-R   | TTGCCCCAGCAGAAATTGA       |
| <i>BcnoxD</i>   | BcnoxD-q-F   | AGTGATAGCAGGTGTTTGGGAAGCT |
|                 | BcnoxD-q-R   | AGCACGCCATCATGTCCTTT      |
| <i>BcnoxR</i>   | BcnoxR-q-F   | ACCCAATTCGTTCTGCTTCGT     |
|                 | BcnoxR-q-R   | ACCGAATGAAGATGCGGATAA     |
| <i>Bcrho3</i>   | Bcrho3-q-F   | CTTCTTCCTCCTGCCAACCA      |
|                 | Bcrho3-q-R   | TGATTGCGAAGGAATGCCTAT     |
| <i>Bcsod1</i>   | Bcsod1-q-F   | ATCTCCGGCACCGTCACTT       |
|                 | Bcsod1-q-F   | ATCTCCGGCACCGTCACTT       |
| <i>Bcbmp1</i>   | Bcbmp1-q-F   | TCTTTCAATGTCAGCGAGCAA     |
|                 | Bcbmp1-q-R   | TGCAAAGCTGAGCAGACAACA     |
| <i>BcG1</i>     | BcG1-q-F     | ACCACGGGTATCACCGAAAC      |
|                 | BcG1-q-R     | TCGGAACGTTGTCCTCCAA       |
| <i>Bcbtp1</i>   | Bcbtp1-q-F   | GGCCGTGTTGTGATCGAAGT      |
|                 | Bcbtp1-q-R   | AGCTTTTCAGGGCGGATGT       |
| <i>Bcplc1</i>   | Bcplc1-q-F   | TCCCGCAGGACTCGATAACT      |
|                 | Bcplc1-q-R   | TATGGCTTCCACTCGGGTTT      |
| <i>Bcbos5</i>   | Bcbos5-q-F   | ACCCACTTCCATGGCAGAAA      |
|                 | Bcbos5-q-R   | CGGGTAACTGTGGTCGTTGTG     |
| <i>Bcbac</i>    | Bcbac-q-F    | CCGTGTCGCTTACCAAGAAAC     |
|                 | Bcbac-q-R    | TTGCATCGCTGGTAGACCATT     |
| <i>Bcras2</i>   | Bcras2-q-F   | TCTTCCCTCGACAGCGTTTG      |
|                 | Bcras2-q-R   | ACGCCGTATGCCACTCTTTT      |
| <i>Bcmsb2</i>   | Bcmsb2-q-F   | CTCACTCCGACCTCACCTCTTC    |
|                 | Bcmsb2-q-R   | TTCGCTCTCGAGTTCGATTGT     |
| <i>Bccrz1</i>   | Bccrz1-q-F   | CATGCAACAGCAGCCTATGG      |
|                 | Bccrz1-q-R   | GTGCAGCAGGTAAGCCGTAAT     |
| <i>Bcste12</i>  | Bcste12-q-F  | CCCCACTCGATTTAGTTGACATC   |
|                 | Bcste12-q-R  | TCATATGCGCCATTCAATTGAG    |
| <i>Bchox8</i>   | Bchox8-q-F   | ATGTCAATGATGCACCGAAGTG    |
|                 | Bchox8-q-R   | CCGGTACCATCATCGGAGAT      |
| <i>Bcmads1</i>  | Bcmads1-q-F  | GAAGGCAAAGCTCCCTGGTA      |

|               |             |                          |
|---------------|-------------|--------------------------|
|               | Bcmads1-q-R | TGATGGATTTGGCGCATACA     |
| <i>Bcboa2</i> | Bcboa2-q-F  | GGCTTGTCGAGACTACCGATCT   |
|               | Bcboa2-q-R  | TGCTCCTAAAGCGCCGATAA     |
| <i>Bcboa6</i> | Bcboa6-q-F  | CTCTTACGCTTACATGCGTCACTT |
|               | Bcboa6-q-R  | CCAGTTAAACAAAGGACGGTGAT  |

**Table S3.** The statistics of whole-genome bisulfite sequencing for 12 samples

| Samples                     | Clean data |      | Mapping rate | Conversion rate | Coverage | Coverage (d $\geq$ 5) |
|-----------------------------|------------|------|--------------|-----------------|----------|-----------------------|
| <b>WT-1</b>                 | 2.2        | G bp | 63.4%        | 99.6%           | 99.99%   | 94.4%                 |
| <b>WT-2</b>                 | 2.1        | G bp | 61.8%        | 99.5%           | 99.99%   | 94.0%                 |
| <b>WT-3</b>                 | 1.9        | G bp | 62.3%        | 99.6%           | 99.99%   | 92.3%                 |
| <b><i>ΔBcdim2-1</i></b>     | 2.1        | G bp | 76.6%        | 99.6%           | 99.99%   | 97.3%                 |
| <b><i>ΔBcdim2-2</i></b>     | 2.5        | G bp | 77.0%        | 99.6%           | 99.99%   | 98.5%                 |
| <b><i>ΔBcdim2-3</i></b>     | 2.1        | G bp | 78.5%        | 99.6%           | 99.99%   | 97.8%                 |
| <b><i>ΔBcrid2-1</i></b>     | 2.2        | G bp | 64.1%        | 99.6%           | 99.99%   | 96.1%                 |
| <b><i>ΔBcrid2-2</i></b>     | 2.3        | G bp | 66.3%        | 99.6%           | 99.99%   | 96.6%                 |
| <b><i>ΔBcrid2-3</i></b>     | 2.2        | G bp | 86.5%        | 99.6%           | 99.99%   | 98.5%                 |
| <b><i>ΔBcdim2rid2-1</i></b> | 2.3        | G bp | 86.2%        | 99.7%           | 99.99%   | 98.8%                 |
| <b><i>ΔBcdim2rid2-2</i></b> | 2.0        | G bp | 87.0%        | 99.6%           | 99.99%   | 96.6%                 |
| <b><i>ΔBcdim2rid2-3</i></b> | 2.0        | G bp | 85.9%        | 99.6%           | 99.99%   | 96.2%                 |

**Table S4.** Global DNA methylation levels of different strains

|                           | C       |         |         | CG      |         |         | CHG     |         |         | CHH     |         |         |
|---------------------------|---------|---------|---------|---------|---------|---------|---------|---------|---------|---------|---------|---------|
|                           | Repeat1 | Repeat2 | Repeat3 |
| <b>WT</b>                 | 0.38%   | 0.44%   | 0.36%   | 0.34%   | 0.40%   | 0.32%   | 0.37%   | 0.43%   | 0.36%   | 0.39%   | 0.45%   | 0.37%   |
| <i><b>ΔBcdim2</b></i>     | 0.37%   | 0.39%   | 0.43%   | 0.33%   | 0.36%   | 0.39%   | 0.37%   | 0.40%   | 0.44%   | 0.38%   | 0.40%   | 0.44%   |
| <i><b>ΔBcri2</b></i>      | 0.39%   | 0.39%   | 0.43%   | 0.36%   | 0.36%   | 0.39%   | 0.39%   | 0.40%   | 0.43%   | 0.40%   | 0.40%   | 0.44%   |
| <i><b>ΔBcdim2rid2</b></i> | 0.28%   | 0.43%   | 0.37%   | 0.25%   | 0.39%   | 0.34%   | 0.28%   | 0.43%   | 0.37%   | 0.29%   | 0.44%   | 0.39%   |

**Table S5** The numbers of methylated cytosines in each sample

| <b>Samples</b>              | <b>Total C</b> | <b>mC</b> | <b>mC%</b> |
|-----------------------------|----------------|-----------|------------|
| <b>WT-1</b>                 | 16851479       | 37        | 0.0002%    |
| <b>WT-2</b>                 | 16779126       | 35        | 0.0002%    |
| <b>WT-3</b>                 | 16486434       | 42        | 0.0002%    |
| <i><b>ΔBcdim2-1</b></i>     | 17406799       | 34        | 0.0002%    |
| <i><b>ΔBcdim2-2</b></i>     | 17625101       | 33        | 0.0002%    |
| <i><b>ΔBcdim2-3</b></i>     | 17487257       | 38        | 0.0002%    |
| <i><b>ΔBcrid2-1</b></i>     | 17178586       | 32        | 0.0002%    |
| <i><b>ΔBcrid2-2</b></i>     | 17278470       | 45        | 0.0002%    |
| <i><b>ΔBcrid2-3</b></i>     | 17620206       | 76        | 0.0002%    |
| <i><b>ΔBcdim2rid2-1</b></i> | 17667930       | 13        | 0.0002%    |
| <i><b>ΔBcdim2rid2-2</b></i> | 17255226       | 91        | 0.0002%    |
| <i><b>ΔBcdim2rid2-3</b></i> | 17196563       | 73        | 0.0002%    |
